# Supplementary material for: School Satisfaction and Its Associations with Health and Behavioural Outcomes among 15-Years Old Adolescents
Source: MDPI journal article supplement (doi:10.3390/ijerph191811514), 2022-09-13
Supplement: s1 [file s1]

**Table S1 Prevalence of each health symptom occurring at least once a week (Slovakia 2018 15-year-olds, N= 816)**

|                         | n (%)      |
|-------------------------|------------|
| <b>Irritability</b>     | 303 (37.1) |
| <b>Nervousness</b>      | 288 (35.3) |
| <b>Sleep difficulty</b> | 192 (23.5) |
| <b>Backache</b>         | 147 (18.0) |
| <b>Headache</b>         | 131 (16.1) |
| <b>Feeling low</b>      | 108 (13.2) |
| <b>Dizziness</b>        | 94 (11.5)  |
| <b>Stomach ache</b>     | 71 (8.7)   |

**Table S2 Prevalence of each health symptom occurring at least once a week stratified by gender and school satisfaction (Slovakia 2018 15-year-olds, N= 816)**

|                     | Headache  | Stomach ache | Backache  | Feeling low | Irritability | Nervousness | Sleep difficulty | Dizziness |
|---------------------|-----------|--------------|-----------|-------------|--------------|-------------|------------------|-----------|
|                     | n (%)     |              |           |             |              |             |                  |           |
| <b>Indifferent</b>  |           |              |           |             |              |             |                  |           |
| <i>Boys</i>         | 15 (10.8) | 9 ( 6.5)     | 25 (18.8) | 13 ( 9.4)   | 53 ( 38.1)   | 48 (34.5)   | 25 (18.0)        | 12 ( 8.6) |
| <i>Girls</i>        | 29 (30.2) | 16 (16.7)    | 19 (19.8) | 24 (25.0)   | 44 (46.9)    | 46 (47.9)   | 35 (36.5)        | 25 (26.0) |
| <b>Inconsistent</b> |           |              |           |             |              |             |                  |           |
| <i>Boys</i>         | 19 ( 8.4) | 10 ( 4.4)    | 32 (14.2) | 13 ( 5.8)   | 77 ( 34.2)   | 64 ( 28.4)  | 39 (17.3)        | 14 ( 6.2) |
| <i>Girls</i>        | 58 (22.0) | 29 (11.0)    | 57 (21.6) | 50 (18.9)   | 105 (39.8)   | 107 (40.5)  | 75 (28.4)        | 40 (15.2) |
| <b>Satisfied</b>    |           |              |           |             |              |             |                  |           |
| <i>Boys</i>         | 3 ( 7.1)  | 2 ( 4.8)     | 7 (16.7)  | 3 ( 7.1)    | 10 (23.8)    | 9 ( 21.4)   | 6 ( 14.3)        | 0 (0.0)   |
| <i>Girls</i>        | 7 (14.0)  | 5 (10.0)     | 7 (14.0)  | 5 (10.0)    | 13 (26.0)    | 14 (28.0)   | 12 (24.0)        | 3 (6.0)   |
